# Supplementary material for: Adenosine-to-inosine editing of endogenous Z-form RNA by the deaminase ADAR1 prevents spontaneous MAVS-dependent type I interferon responses
Source: PubMed Central journal article supplement (PMC8459395; doi:10.1016/j.immuni.2021.08.011), 2021-09-14
Supplement: mmc1.pdf [file mmc1.pdf]

**Immunity, Volume 54**

**Supplemental information**

**Adenosine-to-inosine editing of endogenous Z-form  
RNA by the deaminase ADAR1 prevents spontaneous  
MAVS-dependent type I interferon responses**

**Qiannan Tang, Rachel E. Rigby, George R. Young, Astrid Korning Hvidt, Tanja Davis, Tiong Kit Tan, Anne Bridgeman, Alain R. Townsend, George Kassiotis, and Jan Rehwinkel**

**Figure S1.**

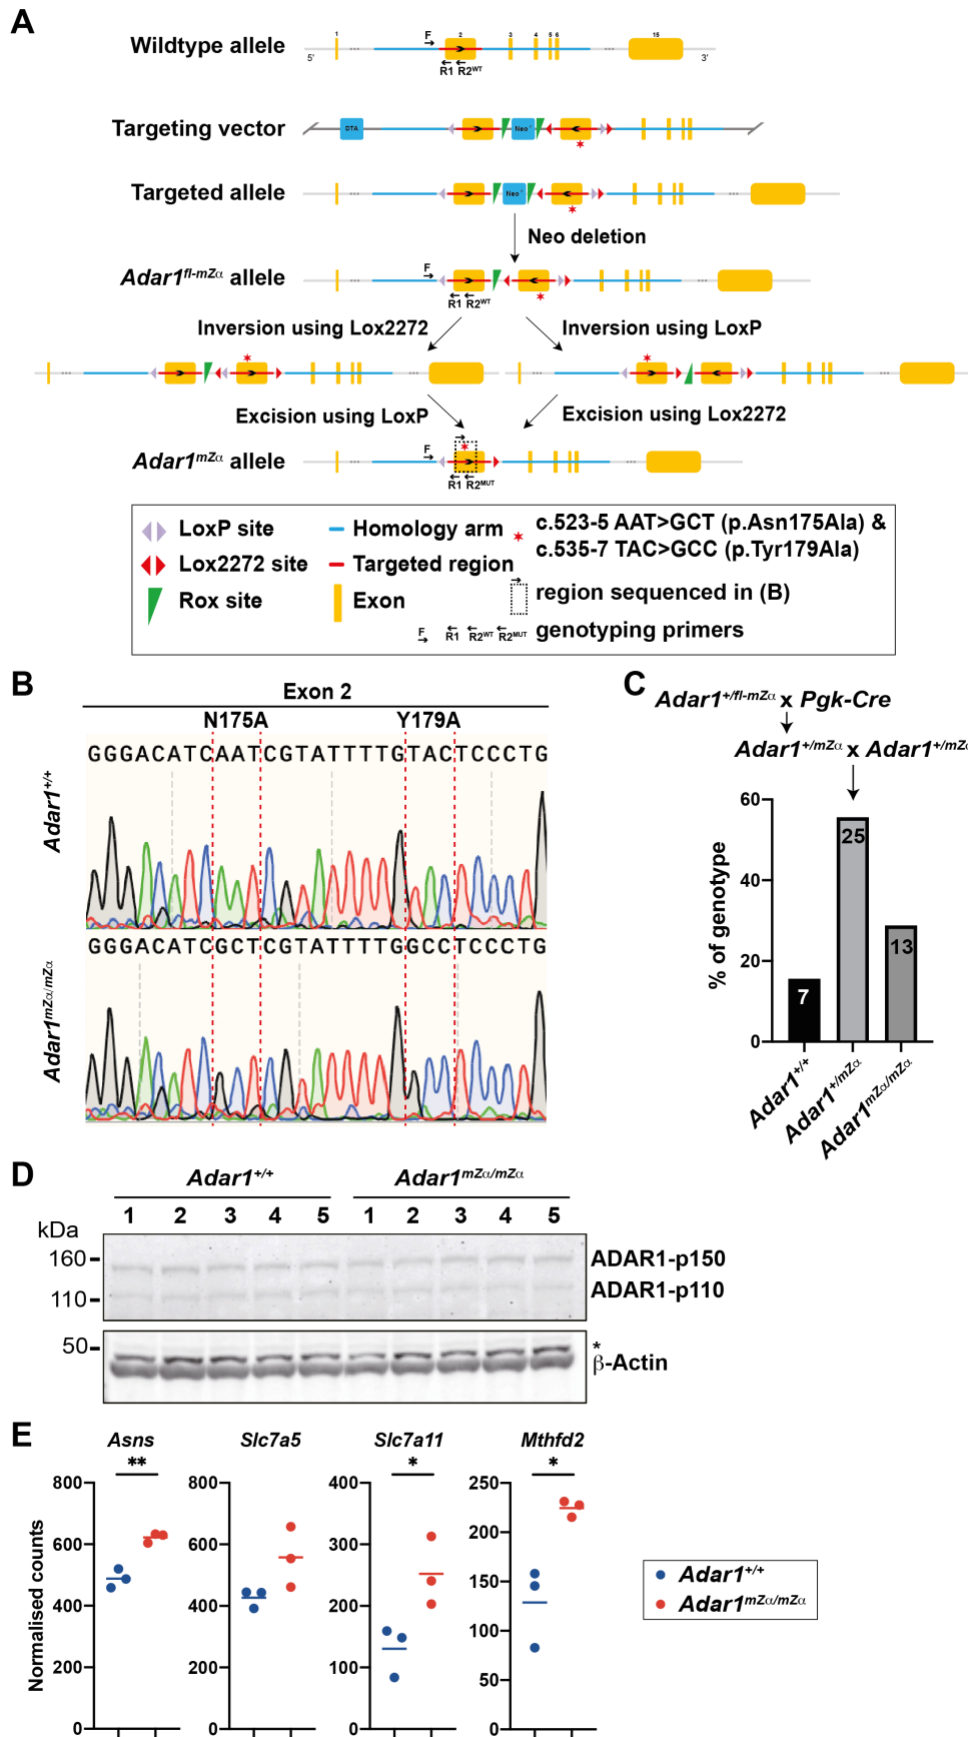

Figure S1, related to Figures 1 and 2. Generation of *Adar1*<sup>mZ $\alpha$ /mZ $\alpha$</sup>  animals.

**A.** Schematic representation of the *Adar1* WT allele, targeting vector, targeted allele, *Adar1*<sup>fl-mZ $\alpha$</sup>  allele and the two-step Cre-mediated recombination process that resulted in the *Adar1*<sup>mZ $\alpha$</sup>  allele. Please see text for details.

**B.** Genomic DNA was prepared from WT and *Adar1*<sup>mZ $\alpha$ /mZ $\alpha$</sup>  animals and the mutated region in exon 2 was sequenced.

**C.** *Adar1*<sup>+/fl-mZ $\alpha$</sup>  mice were bred with the *Pgk-Cre* line. *Adar*<sup>+/mZ $\alpha$</sup>  offspring were then mated to generate *Adar1*<sup>mZ $\alpha$ /mZ $\alpha$</sup>  animals. The numbers and percentages of animals obtained with the indicated genotypes are shown.

**D.** BMDCs were grown from bone marrow from five mice of the indicated genotypes. Protein extracts were used for western blot with  $\alpha$ -ADAR1 antibody.  $\beta$ -Actin served as a loading control. \*, non-specific band

**E.** Normalised read counts for the indicated transcripts from lung RNA sequencing (see Figure 2) are shown.

**Figure S2.**

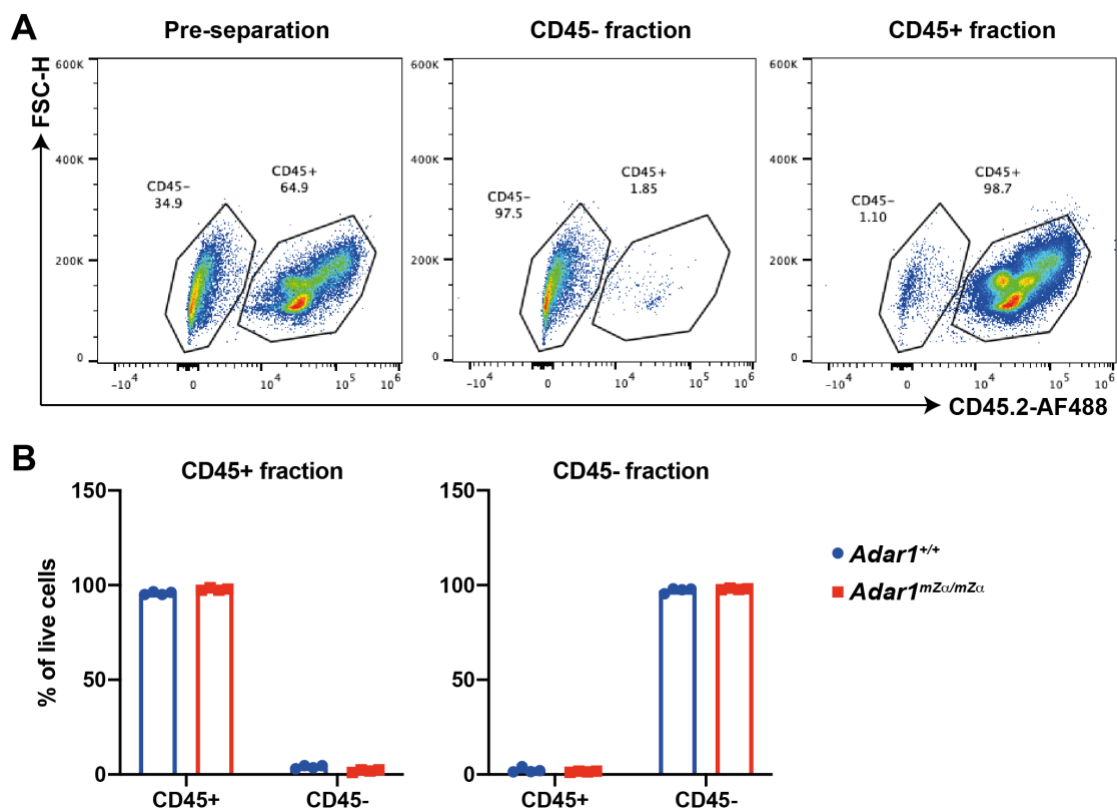

Figure S2, related to Figure 3. MACS separation of lung cells.

**A.** Cell surface levels of CD45 were analysed by flow cytometry in single cell suspensions obtained from lung tissue before MACS (left) and in CD45- and CD45+ cell fractions obtained after MACS (middle and right). Data are from a representative WT animal.

**B.** The percentage of CD45-expressing cells is shown for CD45+ and CD45- MACS fractions. Data points represent individual animals (n=4) from a representative experiment and bars indicate the mean.

**Figure S3.**

**A**

CD45.2-AF488; CD11c-APC; CD11b-BV785  
MHCII-AF700; CD24-BV605; CD64-PE

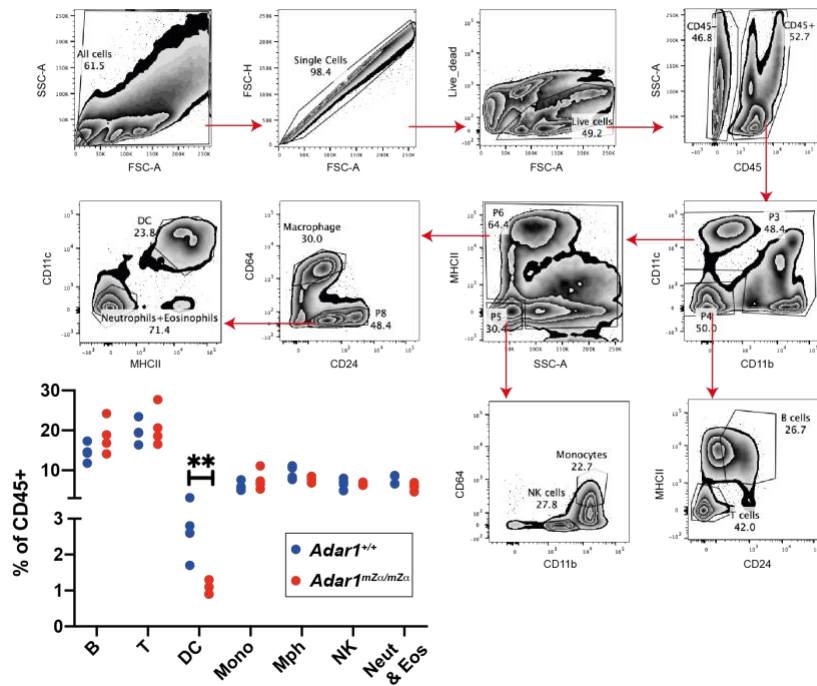

**B**

CD45.2-AF488; CD24-BV605; CD11c-APC  
MHCII-e780; Ly6G-AF700; SiglecF-BV421

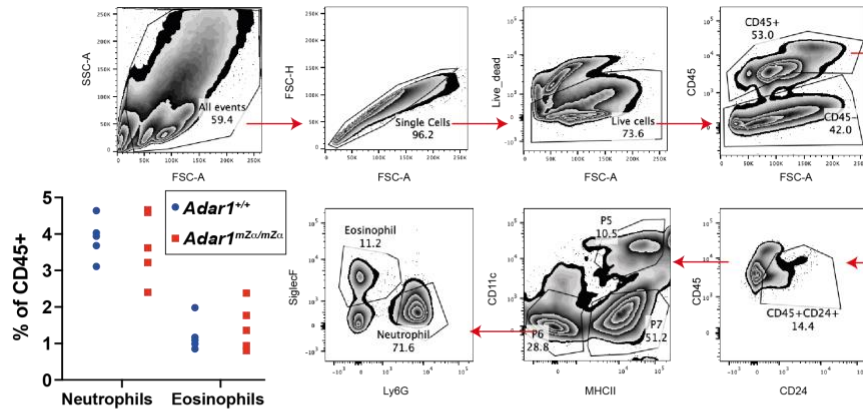

**C**

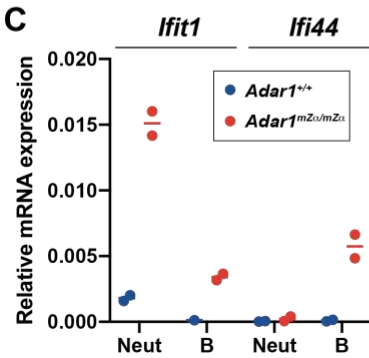

**D**

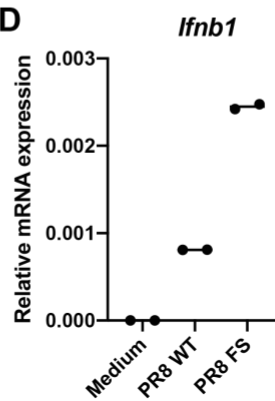

Figure S3, related to Figure 4A and 4B. Gating strategy for sorting of haematopoietic lung cells.

**A-B.** Two staining panels were used to identify and isolate haematopoietic cell populations by FACS. Panel (A) is related to Figure 4A and panel (B) to Figure 4B. Antibodies and conjugated fluorophores are shown in boxes. Gating strategies are shown for a representative WT (A) and *Adar1*<sup>mZ $\alpha$ /mZ $\alpha$</sup>  (B) animal. Bar graphs show the proportion of each cell population as a percentage of CD45+ cells. Each dot represents an individual mouse and data from two independent experiments were pooled (\*\*p<0.01, unpaired t test).

**C.** Neutrophils and B cells were sorted from the lungs of WT and *Adar1*<sup>mZ $\alpha$ /mZ $\alpha$</sup>  mice. RNA samples were reverse transcribed with gene specific primers for *Ifit1*, *Ifi44* and *Ifnb1*, followed by qPCR. *Ifnb1* mRNA levels were undetectable.

**D.** RNA extracted from whole lungs of WT mice 48 hours after intranasal infection with 50,000 pfu of IAV PR8 or of a mutant PR8 virus (PR8 FS; known to induce higher levels of *Ifnb1*) were analysed as in (C).

In (C-D), mRNA levels are shown relative to *Actb*. Each dot represents samples from an individual mouse.

**Figure S4.**

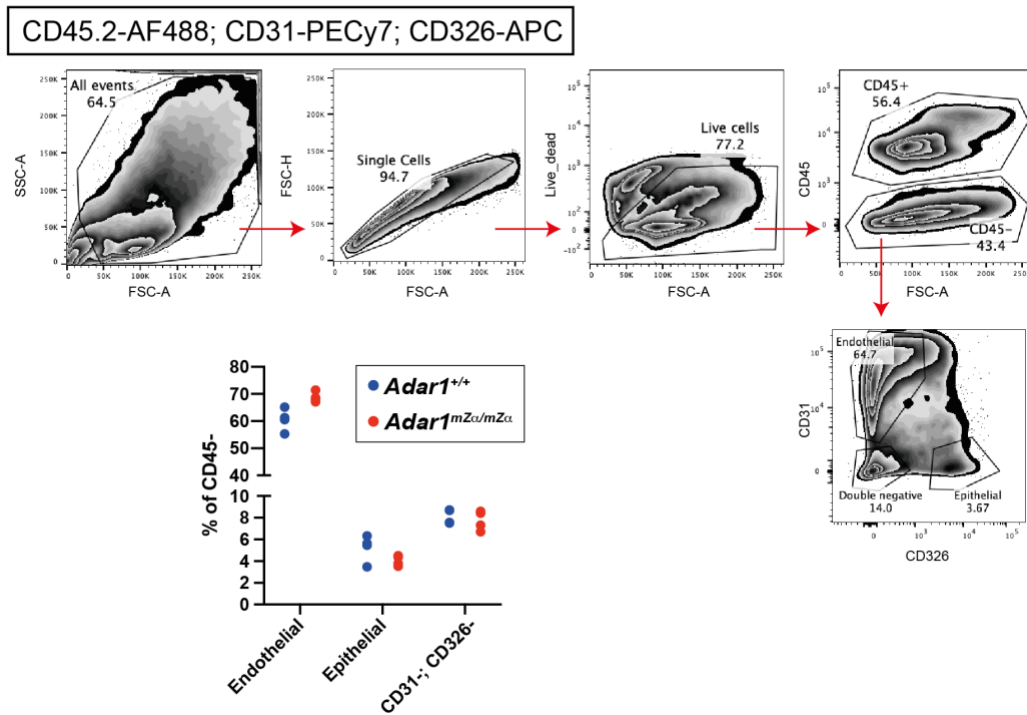

Figure S4, related to Figure 4C. Gating strategy for sorting of stromal lung cells.

The staining panel used to identify and isolate non-haematopoietic cell populations by FACS is shown. Antibodies and conjugated fluorophores are shown in the box. The gating strategy is shown for a representative WT animal. The bar graph shows the proportion of each cell population as a percentage of CD45- cells. Each dot represents an individual mouse.

**Figure S5.**

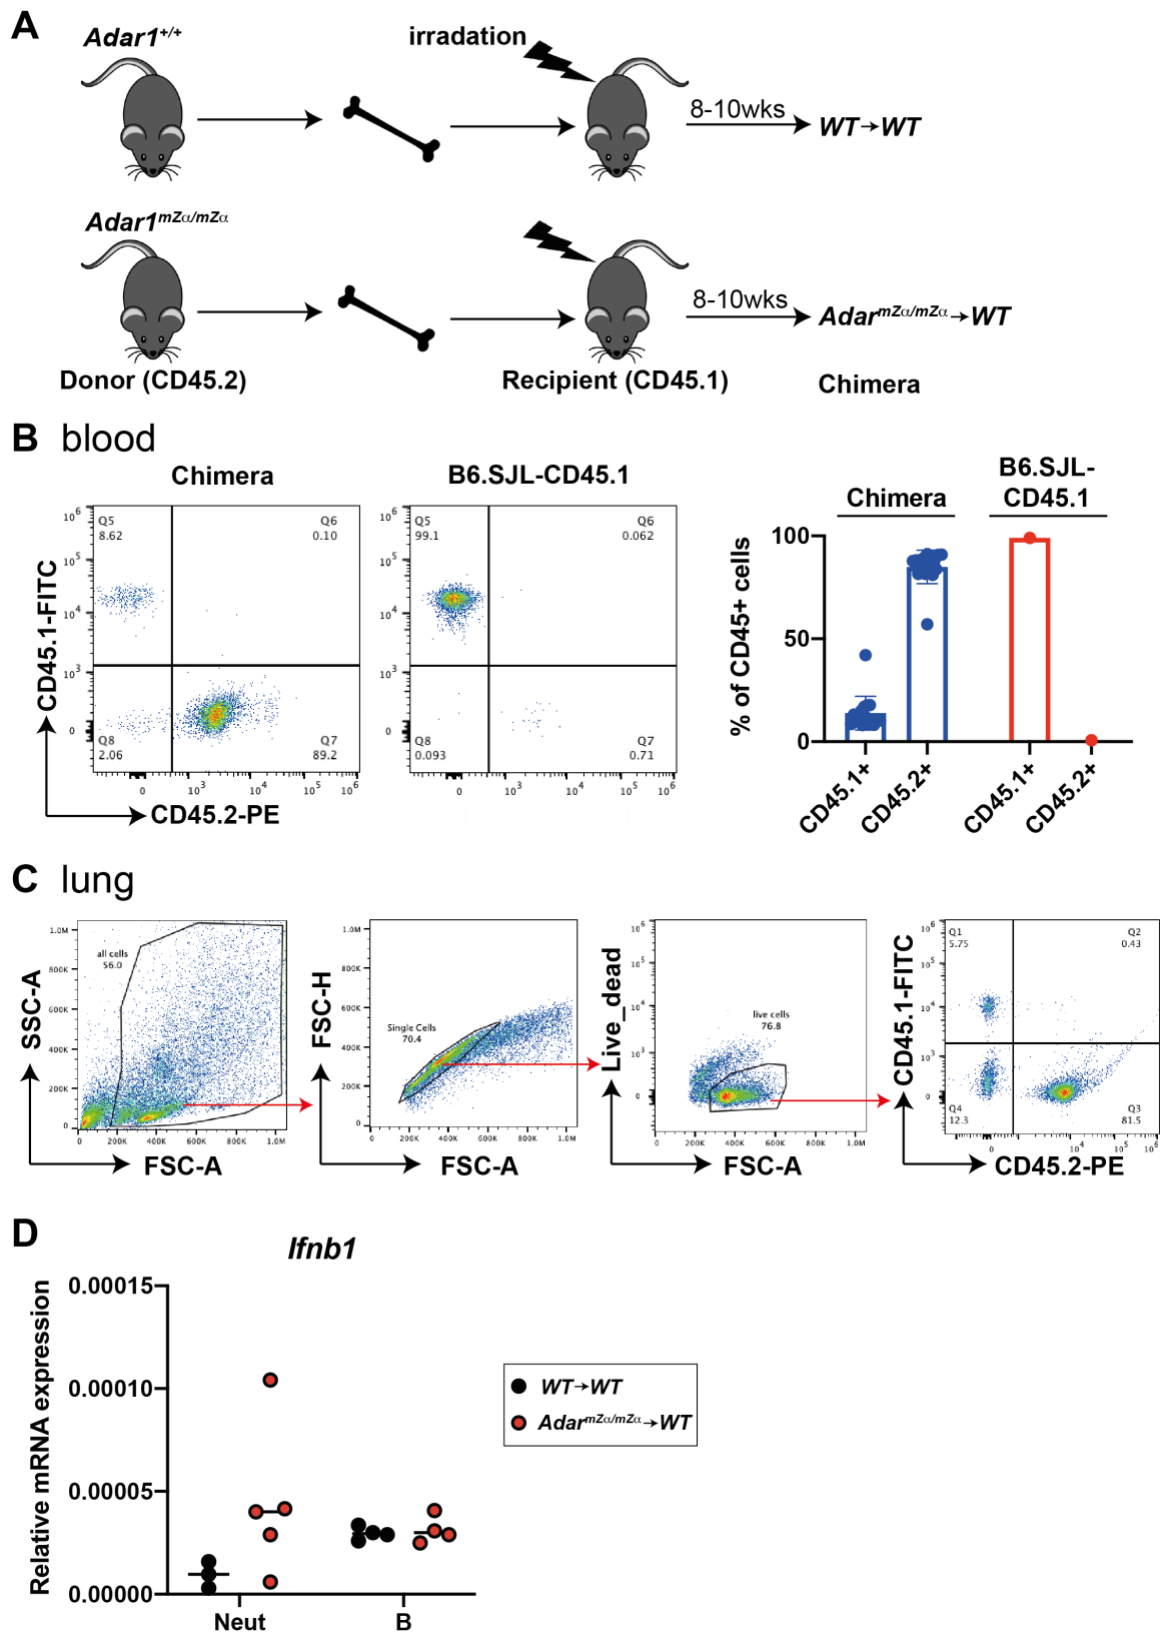



Figure S5, related to Figure 4D. Analysis of BM chimeras.

**A.** Schematic representation of the generation of BM chimeric animals.

**B.** White blood cells from BM chimeric mice and, as control, from an untreated B6.SJL-CD45.1 animal, were analysed by FACS. Cells were gated on single, live cells. Representative FACS plots from a WT→WT animal (left) and pooled data from two independent experiments involving a total seven WT→WT and eight *Adar1*<sup>mZ $\alpha$ /mZ $\alpha$</sup> →WT BM chimeric animals (right) are shown. Bars show the mean and error bars represent SD.

**C.** Lung cells from BM chimeric mice were analysed by FACS. Data from a representative WT→WT animal are shown.

**D.** Neutrophil and B cell RNA samples obtained from the lungs of BM chimeric animals were tested by conventional RT qPCR for *Ifnb1* transcript levels. mRNA levels are shown relative to *Actb*. Each dot represents samples from an individual mouse.

**Figure S6.**

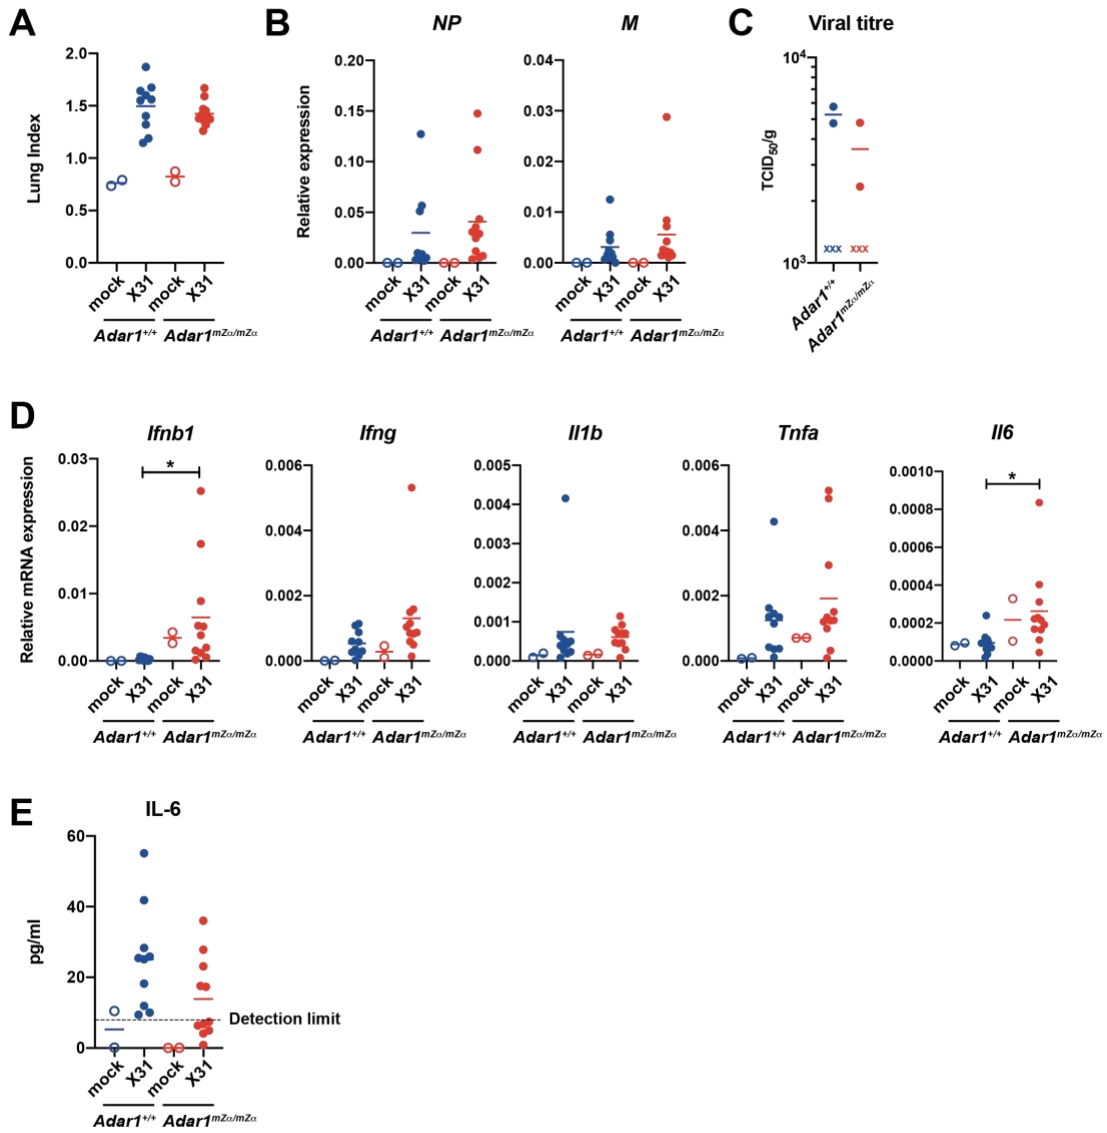

Figure S6. Analysis of WT and *Adar1*<sup>mZ $\alpha$ /mZ $\alpha$</sup>  mice on day 7 after IAV infection.

Related to Figure 5.

**A-E.** WT or *Adar1*<sup>mZ $\alpha$ /mZ $\alpha$</sup>  mice were infected intranasally with 0.04 HAU of IAV strain A/X-31. On day 7 post infection, lungs and sera were collected.

**A.** The 'lung index' was calculated (lung weight/body weight x100).

**B.** Levels of the viral *NP* and *M* transcripts were analysed by RT-qPCR in RNA samples extracted from total lung. Data are shown relative to *Actb* (*NP*) or *Gapdh* (*M*).

**C.** Lung viral titres were determined in samples from infected animals by TCID<sub>50</sub> analysis and were normalised to lung weight. Crosses indicate samples without detectable viral titre.

**D.** Levels of the indicated mRNAs were determined as in (B).

**E.** Serum IL-6 concentrations were analysed by ELISA.

In (A-B and D-E), pooled data from two independent experiments (mock infected: n=2 mice per genotype; A/X-31-infected: n=10 WT and n=11 *Adar1*<sup>mZ $\alpha$ /mZ $\alpha$</sup>  mice) are shown. In (C), data from one experiment with n=5 infected mice per genotype are shown. Each dot represents an individual mouse and the mean is indicated (\*p<0.05, unpaired t test).

**Figure S7.**

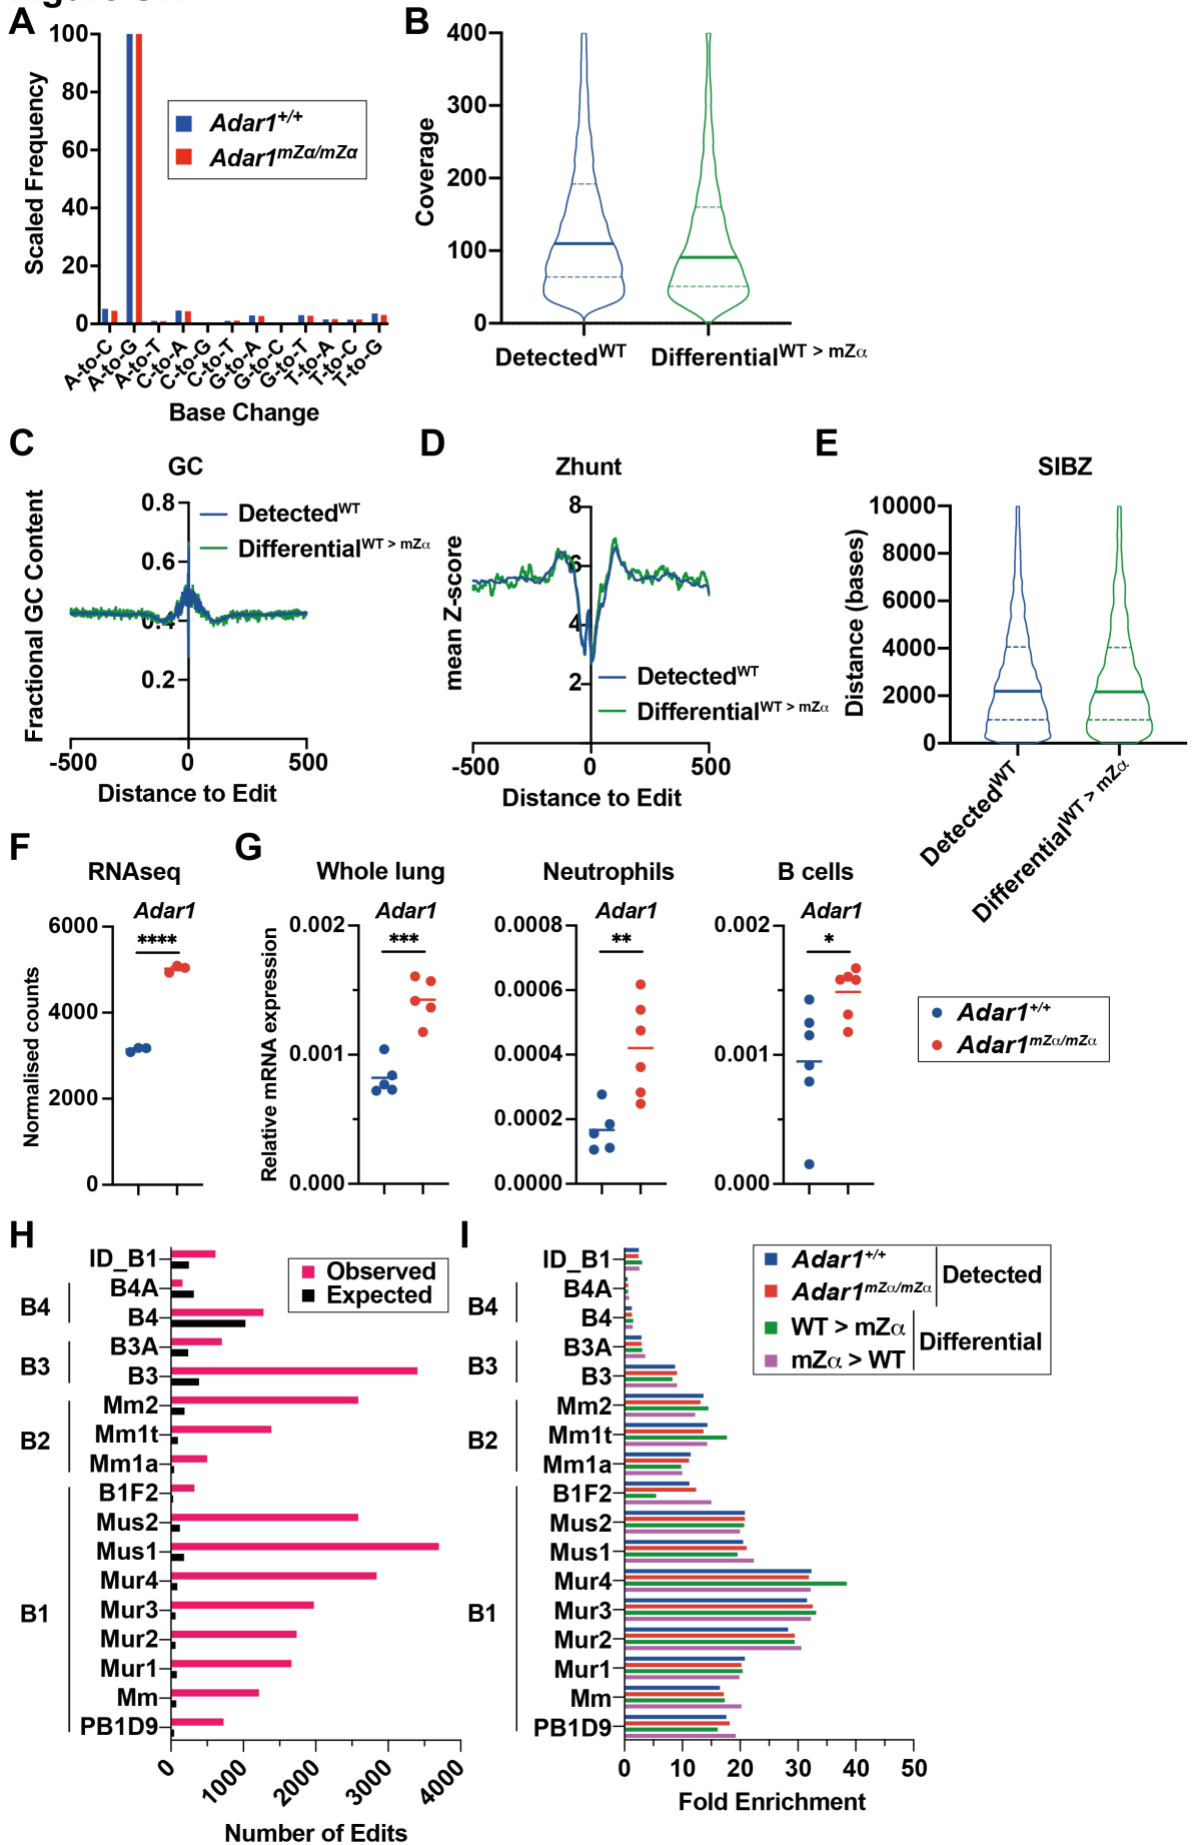

Figure S7. Analysis of RNA editing. Related to Figure 7.

**A.** Differences between the reference genome and RNAseq data were analysed for all possible base changes. The frequency of A-to-G changes was set to 100 for WT and *Adar1*<sup>mZ $\alpha$ /mZ $\alpha$</sup>  lung samples.

**B.** Sequence coverage for 'detected<sup>WT</sup>' and 'differential<sup>WT>mZ $\alpha$</sup> ' sites is shown in violin plots. Solid horizontal lines show the median and dotted lines indicate quartiles.

**C.** Nucleotide composition was analysed in 1001 nt windows centred on editing sites detected in WT mice or on 'differential<sup>WT>mZ $\alpha$</sup> ' sites. The fractional GC content is shown.

**D.** The Zhunt algorithm was used to calculate the propensity of sequences within 500 nt from editing sites to form the Z conformation. Log10 transformed mean z-scores are shown for 'detected<sup>WT</sup>' and 'differential<sup>WT>mZ $\alpha$</sup> ' sites.

**E.** The distances of editing sites to genomic regions predicted by SIBZ to form the Z-conformation is shown in violin plots. Solid horizontal lines show the median and dotted lines indicate quartiles.

**F.** Normalised *Adar1* read counts from lung RNA sequencing (see Figure 2) are shown.

**G.** *Adar1* mRNA levels were analysed by RT-qPCR in RNA samples extracted from whole lungs (left) or from FACS-enriched lung neutrophils (middle) or lung B cells (right) of WT and *Adar1*<sup>mZ $\alpha$ /mZ $\alpha$</sup>  animals. Data are shown relative to *Actb*.

**H.** Sub-families of SINEs were analysed as in Figure 7D, but are plotted to include those where observed or expected values exceeded 250.

**I.** Fold enrichments of editing events were calculated relative to expected numbers of edits for SINE sub-families using editing events detected in WT or *Adar1*<sup>mZ $\alpha$ /mZ $\alpha$</sup>  samples and differentially edited sites.

In (F) and (G), each dot represents an individual mouse and horizontal lines show the mean. In (F), lungs from 3 mice per genotype were sequenced. In (G),

samples from 5-6 mice per genotype were analysed. Data were analysed by unpaired t test (\*\*\*\* $p < 0.0001$ , \*\*\* $p < 0.001$ , \*\* $p < 0.01$ , \* $p < 0.05$ ).

**Table S2. qPCR probes and primers.** Related to STAR Methods.

| <b>Taqman Probes</b>     | <b>Assay Probe ID</b>                                                                                              |
|--------------------------|--------------------------------------------------------------------------------------------------------------------|
| <i>Ifnb1</i>             | Mm00439552_s1                                                                                                      |
| <i>Ifng</i>              | Mm01168134_m1                                                                                                      |
| <i>Tnfa</i>              | Mm00443258_m1                                                                                                      |
| <i>Il1b</i>              | Mm00434228_m1                                                                                                      |
| <i>Il6</i>               | Mm00446191_m1                                                                                                      |
| <i>Ifit1</i>             | Mm00515153_m1                                                                                                      |
| <i>Ifit2</i>             | Mm00492606_m1                                                                                                      |
| <i>Ifi44</i>             | Mm00505670_m1                                                                                                      |
| <i>Isg15</i>             | Mm01705338_s1                                                                                                      |
| <i>Isg20</i>             | Mm00469585_m1                                                                                                      |
| <i>Zbp1</i>              | Mm01247052_m1                                                                                                      |
| <i>Oas1a</i>             | Mm00836412_m1                                                                                                      |
| <i>NP</i>                | Custom probe based on NC_002019.1<br>Assay ID:AIX02UC                                                              |
| <i>Actin</i>             | Mm02619580_g1                                                                                                      |
| <i>Gapdh</i>             | Mm99999915_g1 (4352932E)                                                                                           |
| <b>SYBR Green oligos</b> | <b>Sequence</b>                                                                                                    |
| <i>M</i>                 | F: 5'-CTTCTAACCGAGGTCGAAACGTA<br>R: 5'-GGTGACAGGATTGGTCTTGCTTTA<br>from: Shin et al. 2013, Virology Journal 10:303 |
| <i>Gapdh</i>             | F: 5'-CATGGCCTTCCGTGTTCCCTA<br>R: 5'-CCTGCTTCACCACCTTCTTGAT<br>from: Tsujita et al. 2006, PNAS 103:11946           |
